# Supplementary material for: An HPLC Method for Separation of Delta 9 THC from Delta 8 THC
Source: Preprints.org preprint supplement (doi:10.20944/preprints202403.0367.v1), 2024-03-06
Supplement: Supplementary file 3 [file supplementary]

**Supplemental Information**

**An Method for Separation of Delta 9 THC from Delta 8 THC**

Giovanni A. Ramirez^, Monica K. Pittiglio^, Tesfay T. Tesfatsion, Kyle P. Ray, Westley Cruces*

*Colorado Chromatography Labs, 10505 S Progress Way Unit 105, Parker, CO 80134*

*Corresponding Author: [wes@coloradochromatography.com](mailto:wes@coloradochromatography.com), 303-856-3244

^Both Authors contributed equally.

**Table of Contents:**

- Figure S1: 1H NMR D8THC S2
- Figure S2: 13C NMR D8THC S3
- Figure S3: HPLC of the mixture of THC isomers from CRM S4
- Figure S4: HPLC of the synthesized THC mixture of isomers S4
- Figure S5: HPLC of synthesized THC following the removal of D9 THC. S5


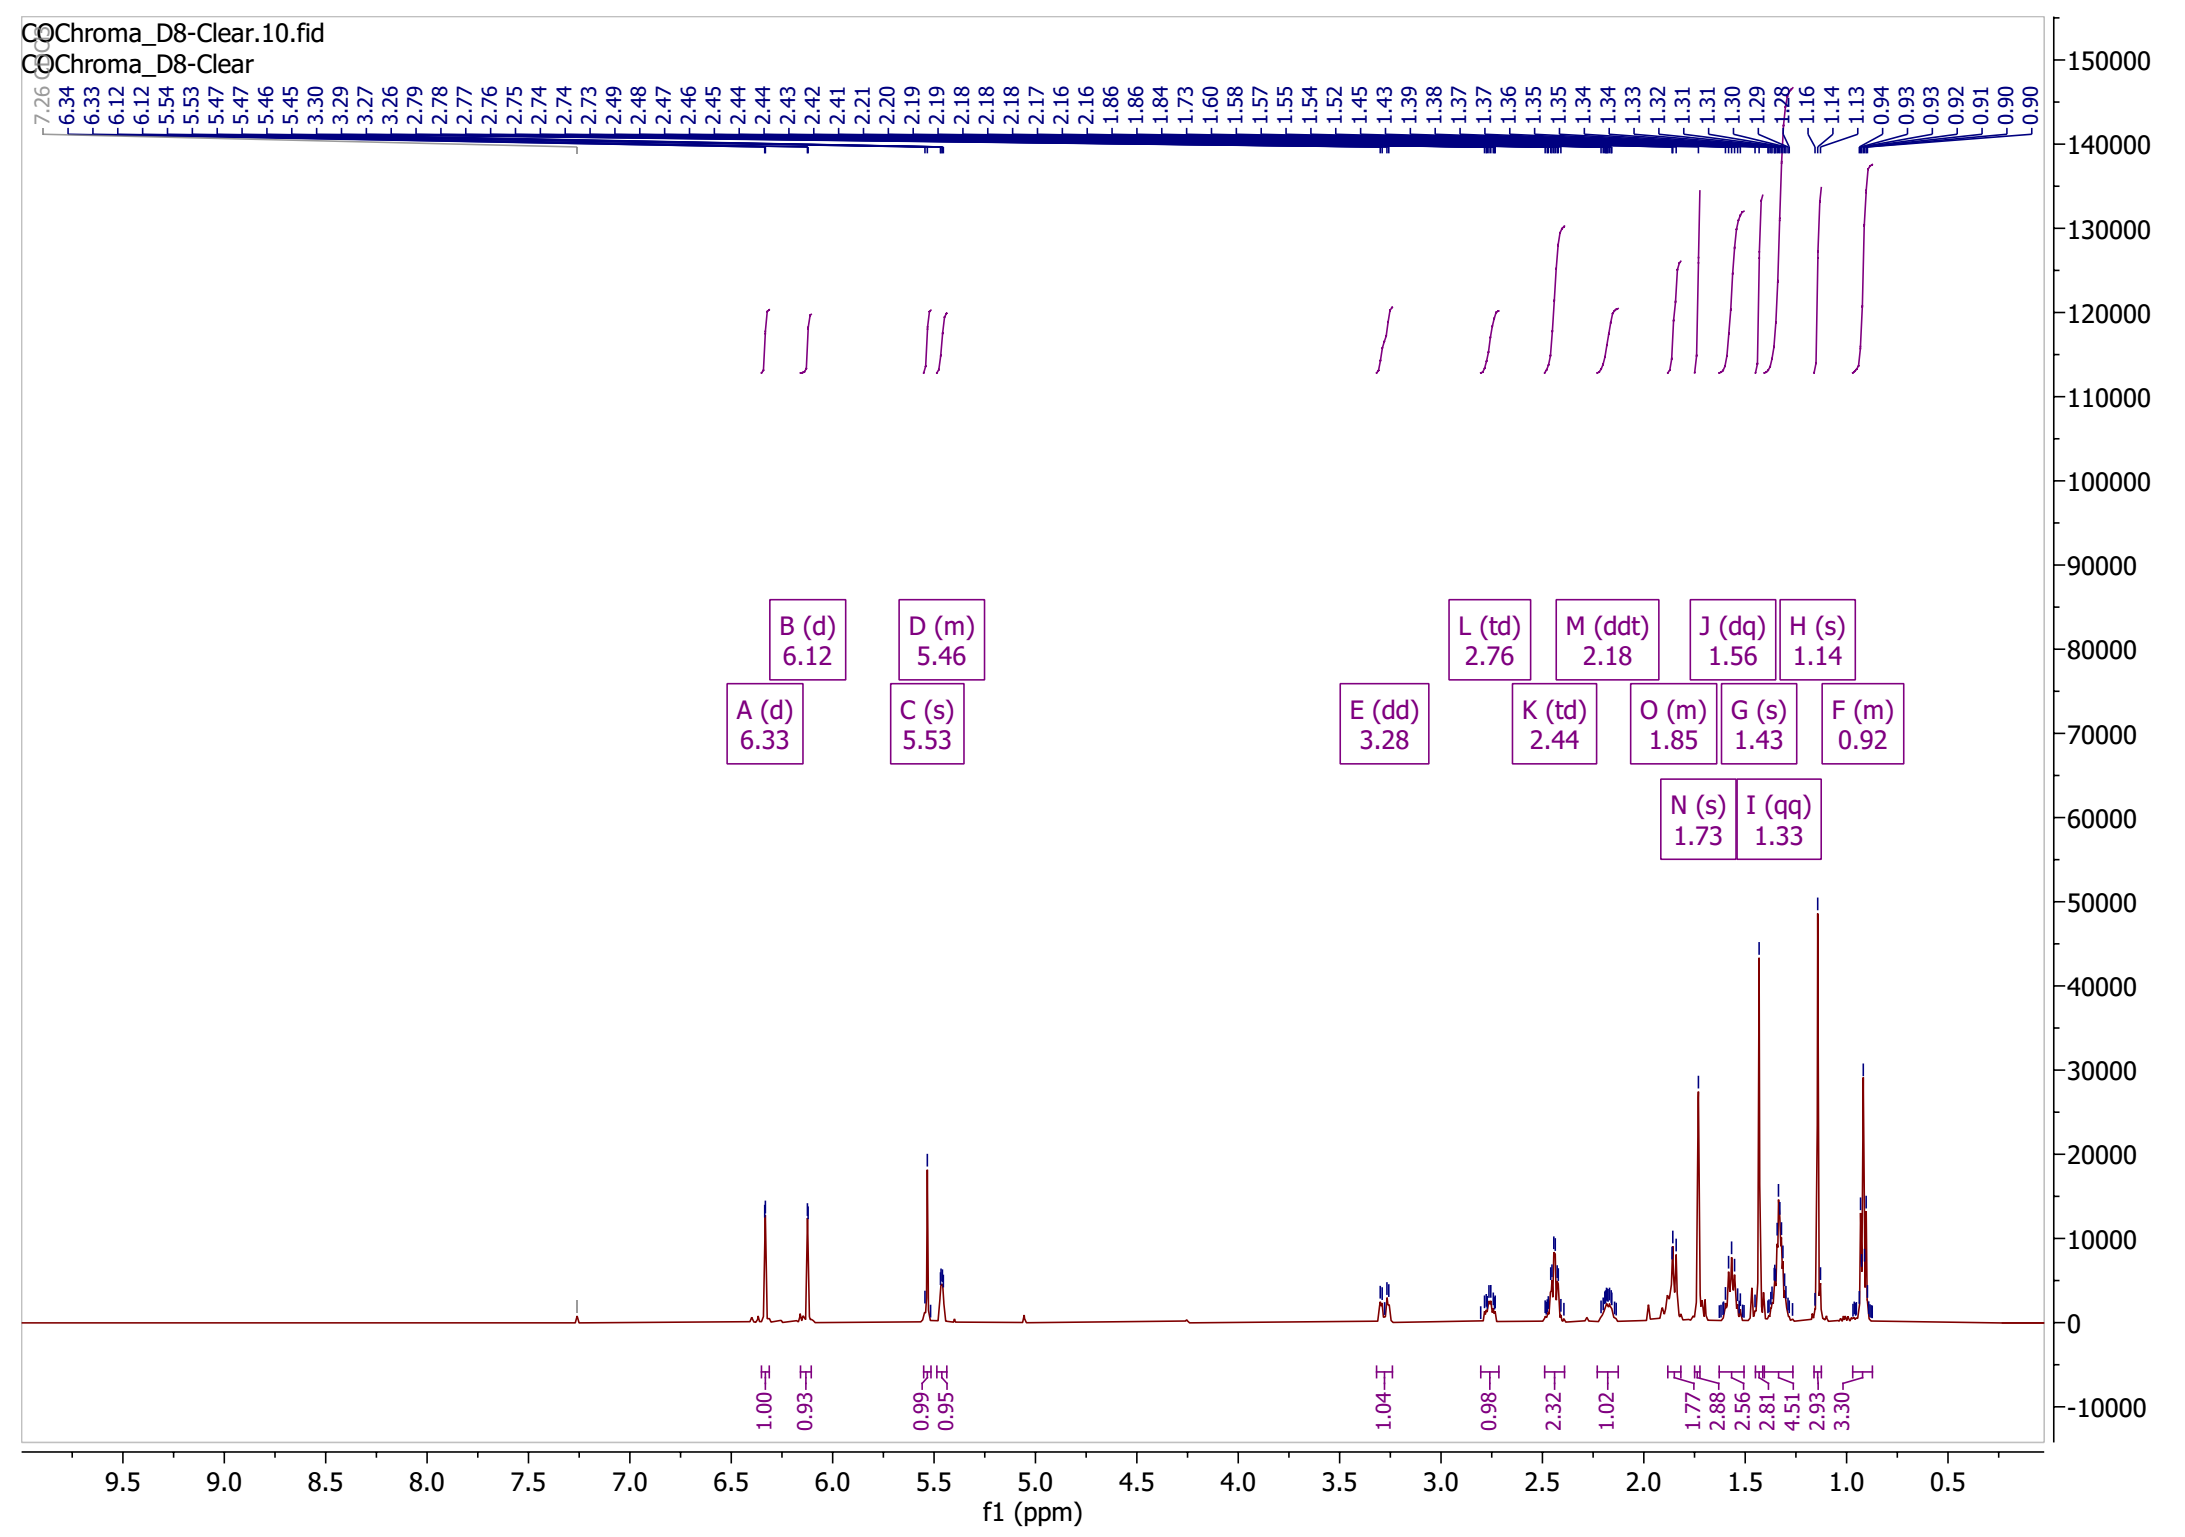


**Figure S1:** 1H NMR D8THC


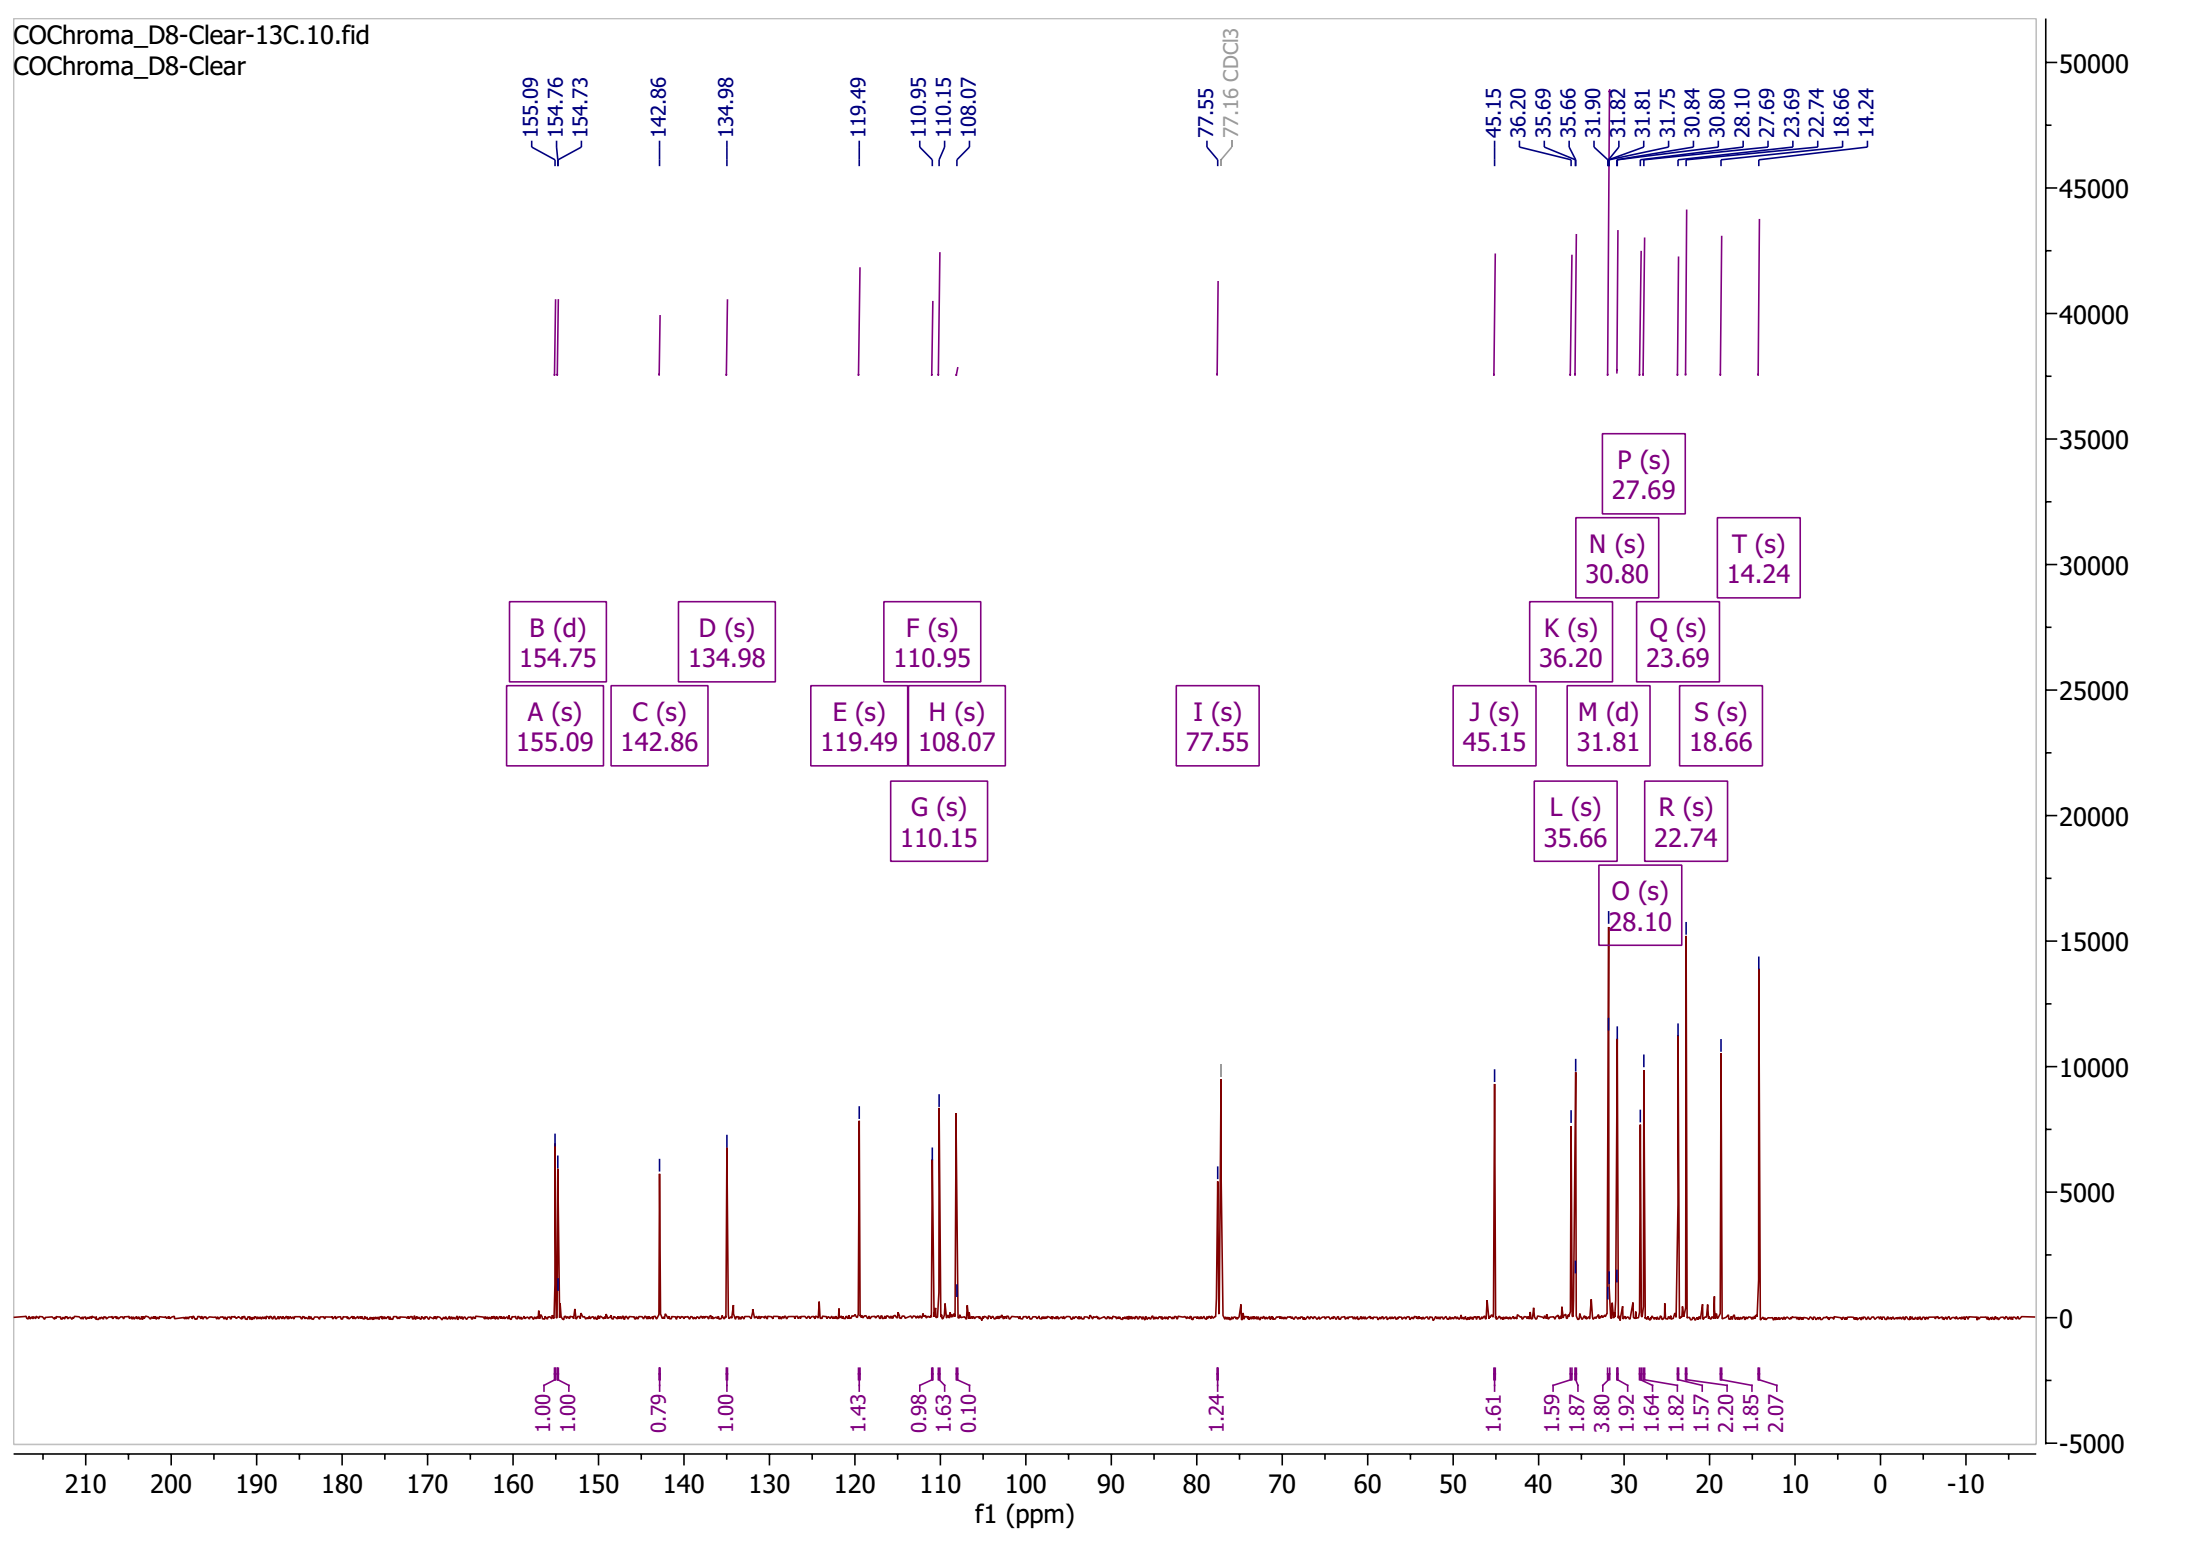


**Figure S2:** 13C NMR D8THC


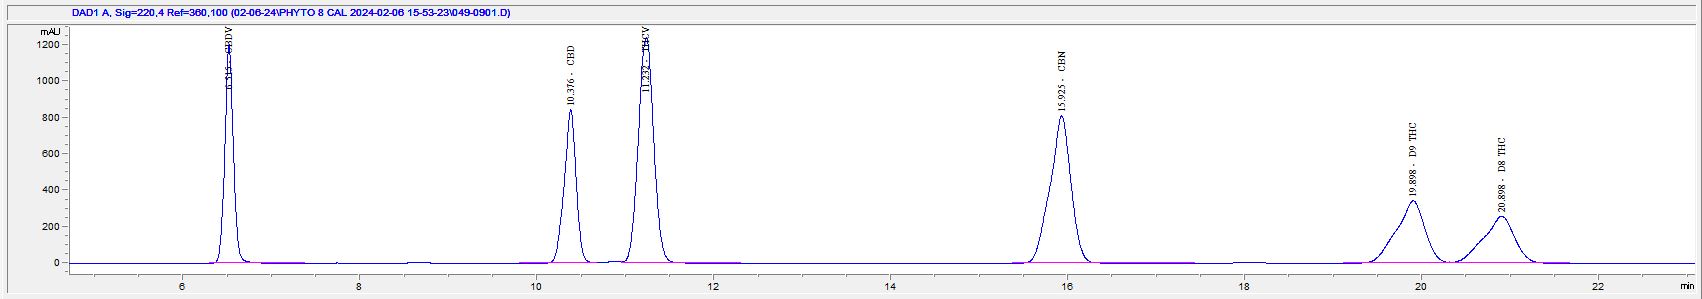


**Figure S3**: HPLC of the mixture of THC isomers from CRM standards.


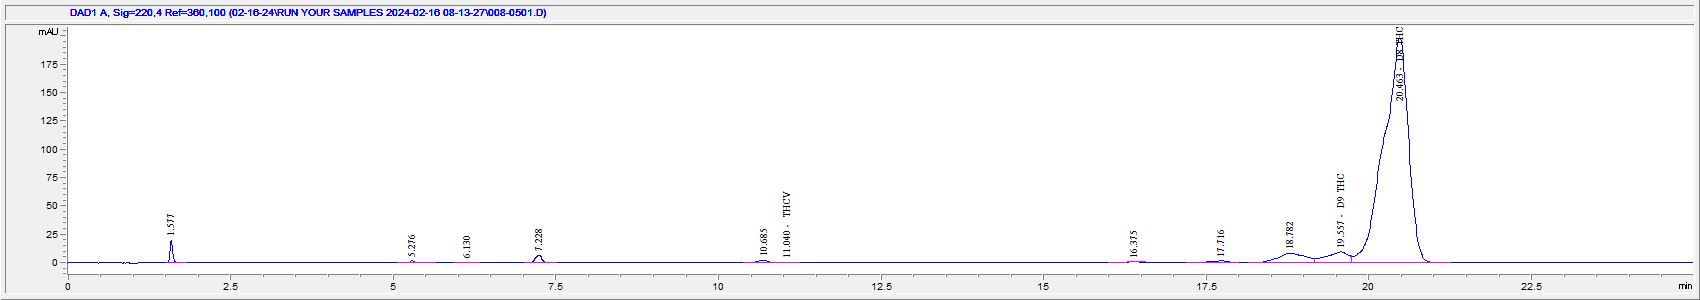


**Figure S4**: HPLC of the synthesized THC mixture of isomers.


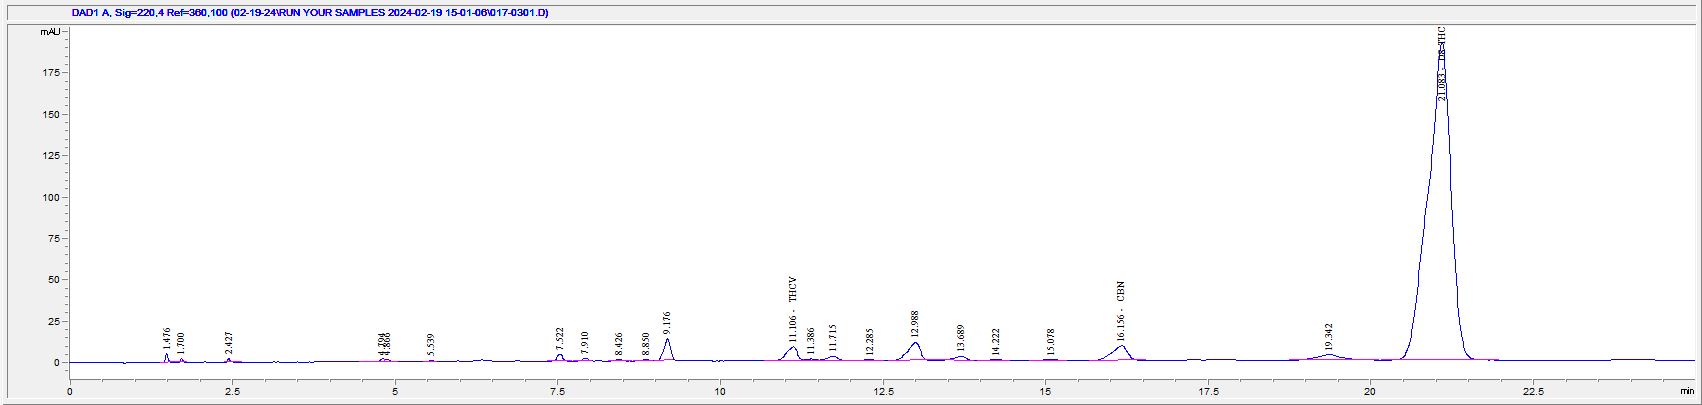


**Figure S5**: HPLC of synthesized THC following the removal of D9 THC.
